# Supplementary material for: Decarbonized Energies and the Wealth of Three European Nations: A Comparative Nexus Study Using Granger and Toda-Yamamoto Approaches
Source: Frontiers journal article supplement (doi:10.3389/fenvs.2021.817982), 2022-01-17
Supplement: Table_2.DOCX [file Table_2.DOCX]

CODE FROM STATA. I COULD NOT UPLOAD IT AS DO-FILE. I COPIED THE CODE IN THIS WORD DOCUMENT.

*Working Directory*

cd ""

import excel using DATABASE_final.xlsx, firstrow clear

*DESTRING VARIABLES*

destring REC_FR REC_SP REC_GM, replace

*RENAME*

rename (importexcelusingDATABASExlsx)(YEARS)

tsset YEARS // For the three countries, Series cover the 1986-2019 period

* Preliminary Statistics

sum Y_FR K_FR L_FR EXP_FR NEC_FR REC_FR Y_SP K_SP L_SP EXP_SP NEC_SP REC_SP Y_GM K_GM L_GM EXP_GM NEC_GM REC_GM, detail

tabstat Y_FR K_FR L_FR EXP_FR NEC_FR REC_FR Y_SP K_SP L_SP EXP_SP NEC_SP REC_SP Y_GM K_GM L_GM EXP_GM NEC_GM REC_GM, stat(mean median sd skewness kurtosis range iqr cv)

* Jbera

vec Y_FR K_FR L_FR EXP_FR NEC_FR REC_FR Y_SP K_SP L_SP EXP_SP NEC_SP REC_SP Y_GM K_GM L_GM EXP_GM NEC_GM REC_GM

vecnorm

*GENERATING LOG, FIRST DIFFERENCE AND EXP SERIES********************************

gen LY_FR= ln(Y_FR)

gen LK_FR= ln(K_FR)

gen LL_FR= ln(L_FR)

gen LEXP_FR= ln(EXP_FR)

gen LNEC_FR= ln(NEC_FR)

gen LREC_FR= ln(REC_FR)

gen LY_SP= ln(Y_SP)

gen LK_SP= ln(K_SP)

gen LL_SP= ln(L_SP)

gen LEXP_SP= ln(EXP_SP)

gen LNEC_SP= ln(NEC_SP)

gen LREC_SP= ln(REC_SP)

gen LY_GM= ln(Y_GM)

gen LK_GM= ln(K_GM)

gen LL_GM= ln(L_GM)

gen LEXP_GM= ln(EXP_GM)

gen LNEC_GM= ln(NEC_GM)

gen LREC_GM= ln(REC_GM)

gen Y_FR1= exp(Y_FR)

gen K_FR1= exp(K_FR)

gen L_FR1= exp(L_FR)

gen EXP_FR1= exp(EXP_FR)

gen NEC_FR1= exp(NEC_FR)

gen REC_FR1= exp(REC_FR)

gen Y_SP1= exp(Y_SP)

gen K_SP1= exp(K_SP)

gen L_SP1= exp(L_SP)

gen EXP_SP1= exp(EXP_SP)

gen NEC_SP1= exp(NEC_SP)

gen REC_SP1= exp(REC_SP)

gen Y_GM1= exp(Y_GM)

gen K_GM1= exp(K_GM)

gen L_GM1= exp(L_GM)

gen EXP_GM1= exp(EXP_GM)

gen NEC_GM1= exp(NEC_GM)

gen REC_GM1= exp(REC_GM)

gen DLY_FR= d.Y_FR

gen DLK_FR= d.K_FR

gen DLL_FR= d.L_FR

gen DLEXP_FR= d.EXP_FR

gen DLNEC_FR= d.NEC_FR

gen DLREC_FR= d.REC_FR

gen DLY_SP= d.Y_SP

gen DLK_SP= d.K_SP

gen DLL_SP= d.L_SP

gen DLEXP_SP= d.EXP_SP

gen DLNEC_SP= d.NEC_SP

gen DLREC_SP= d.REC_SP

gen DLY_GM= d.Y_GM

gen DLK_GM= d.K_GM

gen DLL_GM= d.L_GM

gen DLEXP_GM= d.EXP_GM

gen DLNEC_GM= d.NEC_GM

gen DLREC_GM= d.REC_GM

gen DY_FR1= d.Y_FR1

gen DK_FR1= d.K_FR1

gen DL_FR1= d.L_FR1

gen DEXP_FR1= d.EXP_FR1

gen DNEC_FR1= d.NEC_FR1

gen DREC_FR1= d.REC_FR1

gen DY_SP1= d.Y_SP1

gen DK_SP1= d.K_SP1

gen DL_SP1= d.L_SP1

gen DEXP_SP1= d.EXP_SP1

gen DNEC_SP1= d.NEC_SP1

gen DREC_SP1= d.REC_SP1

gen DY_GM1= d.Y_GM1

gen DK_GM1= d.K_GM1

gen DL_GM1= d.L_GM1

gen DEXP_GM1= d.EXP_GM1

gen DNEC_GM1= d.NEC_GM1

gen DREC_GM1= d.REC_GM1

* LAG LENGTH SELECTION *

varsoc LY_FR

varsoc LK_FR

varsoc LL_FR

varsoc LEXP_FR

varsoc LNEC_FR

varsoc LREC_FR

varsoc LY_SP

varsoc LK_SP

varsoc LL_SP

varsoc LEXP_SP

varsoc LNEC_SP

varsoc LREC_SP

varsoc LY_GM

varsoc LK_GM

varsoc LL_GM

varsoc LEXP_GM

varsoc LNEC_GM

varsoc LREC_GM

***VECTOR ERROR CORRECTION MODEL************************************************

*FR*

vec LY_FR LNEC_FR LREC_FR LK_FR LL_FR LEXP_FR, rank(1)

*SP*

vec LY_SP LNEC_SP DLREC_SP LK_SP LL_SP LEXP_SP, rank(2) lags(3)

*GM*

vec LY_GM LNEC_GM LREC_GM LK_GM LL_GM LEXP_GM, rank(1)

vecnorm

*IMPULSE RESPONSE FUNCTIONS*****************************************************

*FRANCE*

var Y_FR NEC_FR REC_FR, lags(1)

irf set irf1

irf create irf1, step(10)

irf graph irf

*SPAIN*

var DLY_SP DLNEC_SP REC_SP1, lags(1)

irf set irf2

irf create irf2, step(10)

irf graph irf

*GERMANY*

var Y_GM NEC_GM REC_GM, lags(1)

irf set irf3

irf create irf3, step(10)

irf graph irf

*GREGORY HANSEN COINTEGRATION TEST: BREAK LEVEL TREND REGIME REGIMETREND********

ghansen LL_FR LNEC_FR LREC_FR LY_FR, break(level) lagmethod(downt)

ghansen LL_FR LNEC_FR LREC_FR LY_FR, break(trend) lagmethod(downt)

ghansen LL_FR LNEC_FR LREC_FR LY_FR, break(regime) lagmethod(downt)

ghansen LL_FR LNEC_FR LREC_FR LY_FR, break(regimetrend) lagmethod(downt)

ghansen LREC_SP LY_SP, break(level) lagmethod(downt)

ghansen LNEC_SP LY_SP, break(trend) lagmethod(downt)

ghansen LNEC_SP LY_SP, break(regime) lagmethod(downt)

ghansen LNEC_SP LY_SP, break(regimetrend) lagmethod(downt)

ghansen LL_GM LNEC_GM, break(level) lagmethod(downt)

ghansen LL_GM LNEC_GM LREC_GM LY_GM, break(trend) lagmethod(downt)

ghansen LL_GM LNEC_GM, break(regime) lagmethod(downt)

ghansen LL_GM LNEC_GM, break(regimetrend) lagmethod(downt)

* GRAPH*************************************************************************

tsline NEC_FR1 NEC_SP1 NEC_GM1, scheme(s2mono) name(NEC)

tsline REC_FR1 REC_SP1 REC_GM1, scheme(s2mono) name(REC)

tsline Y_FR1 Y_SP1 Y_GM1, scheme(s2mono) name(Y)

graph combine NEC REC Y, name(leftright2)

* ROBUSTNESS: Correlation matrix******************************************

*FRANCE*

sktest LY_FR LNEC_FR LREC_FR LK_FR LL_FR LEXP_FR

*SPAIN*

sktest LY_SP LNEC_SP LREC_SP LK_SP LL_SP LEXP_SP

*GERMANY*

sktest LY_GM LNEC_GM LREC_GM LK_GM LL_GM LEXP_GM

*FRANCE*

correlate LY_FR LNEC_FR LREC_FR LK_FR LL_FR LEXP_FR

*SPAIN*

correlate LY_SP LNEC_SP LREC_SP LK_SP LL_SP LEXP_SP

*GERMANY*

correlate LY_GM LNEC_GM LREC_GM LK_GM LL_GM LEXP_GM

*FRANCE

pwcorr LY_FR LNEC_FR LREC_FR LK_FR LL_FR LEXP_FR, sig bon star(.05)

*SPAIN*

pwcorr LY_SP LNEC_SP LREC_SP LK_SP LL_SP LEXP_SP, sig bon star(.05)

*GERMANY*

pwcorr LY_GM LNEC_GM LREC_GM LK_GM LL_GM LEXP_GM, sig bon star(.05)

*We would like to thank the reviewers and the editor for their valuable comments*

*Working Directory*

cd "C:\Users"

import excel using Database.xlsx, firstrow clear

tsset Years

*DESTRING VARIABLES*

destring Y_FR K_FR L_FR EXP_FR NEC_FR REC_FR Y_SP K_SP L_SP EXP_SP NEC_SP REC_SP Y_GM K_GM L_GM EXP_GM NEC_GM REC_GM, replace

gen DY_FR =d.Y_FR

gen DK_FR =d.K_FR

gen DL_FR =d.L_FR

gen DEXP_FR =d.EXP_FR

gen DNEC_FR =d.NEC_FR

gen DREC_FR =d.REC_FR

gen DY_SP =d.Y_SP

gen DK_SP =d.K_SP

gen DL_SP =d.L_SP

gen DEXP_SP =d.EXP_SP

gen DNEC_SP =d.NEC_SP

gen DREC_SP =d.REC_SP

gen DY_GM =d.Y_GM

gen DK_GM =d.K_GM

gen DL_GM =d.L_GM

gen DEXP_GM =d.EXP_GM

gen DNEC_GM =d.NEC_GM

gen DREC_GM =d.REC_GM

*Zivot-Andrews Unit Root Test with Structural Breaks*

zandrews DY_FR, break(intercept) lagmethod(AIC)

zandrews DY_FR, break(both) lagmethod(AIC)

zandrews DK_FR, break(intercept) lagmethod(AIC)

zandrews DK_FR, break(both) lagmethod(AIC)

zandrews DL_FR, break(intercept) lagmethod(AIC)

zandrews DL_FR, break(both) lagmethod(AIC)

zandrews DEXP_FR, break(intercept) lagmethod(AIC)

zandrews DEXP_FR, break(both) lagmethod(AIC)

zandrews DNEC_FR, break(intercept) lagmethod(AIC)

zandrews DNEC_FR, break(both) lagmethod(AIC)

zandrews DREC_FR, break(intercept) lagmethod(AIC)

zandrews DREC_FR , break(both) lagmethod(AIC)

zandrews DY_SP, break(intercept) lagmethod(AIC)

zandrews DY_SP, break(both) lagmethod(AIC)

zandrews DK_SP, break(intercept) lagmethod(AIC)

zandrews DK_SP, break(both) lagmethod(AIC)

zandrews DL_SP, break(intercept) lagmethod(AIC)

zandrews DL_SP, break(both) lagmethod(AIC)

zandrews DEXP_SP, break(intercept) lagmethod(AIC)

zandrews DEXP_SP, break(both) lagmethod(AIC)

zandrews DNEC_SP, break(intercept) lagmethod(AIC)

zandrews DNEC_SP, break(both) lagmethod(AIC)

zandrews DREC_SP, break(intercept) lagmethod(AIC)

zandrews DREC_SP , break(both) lagmethod(AIC)

zandrews DY_GM, break(intercept) lagmethod(AIC)

zandrews DY_GM, break(both) lagmethod(AIC)

zandrews DK_GM, break(intercept) lagmethod(AIC)

zandrews DK_GM, break(both) lagmethod(AIC)

zandrews DL_GM, break(intercept) lagmethod(AIC)

zandrews DL_GM, break(both) lagmethod(AIC)

zandrews DEXP_GM, break(intercept) lagmethod(AIC)

zandrews DEXP_GM, break(both) lagmethod(AIC)

zandrews DNEC_GM, break(intercept) lagmethod(AIC)

zandrews DNEC_GM, break(both) lagmethod(AIC)

zandrews DREC_GM, break(intercept) lagmethod(AIC)

zandrews DREC_GM , break(both) lagmethod(AIC)
